# Supplementary material for: Dynamic Nucleosome Organization at hox Promoters during Zebrafish Embryogenesis
Source: PubMed Central journal article supplement (PMC3650070; doi:10.1371/journal.pone.0063175), 2013-05-09

**Figure S1.**

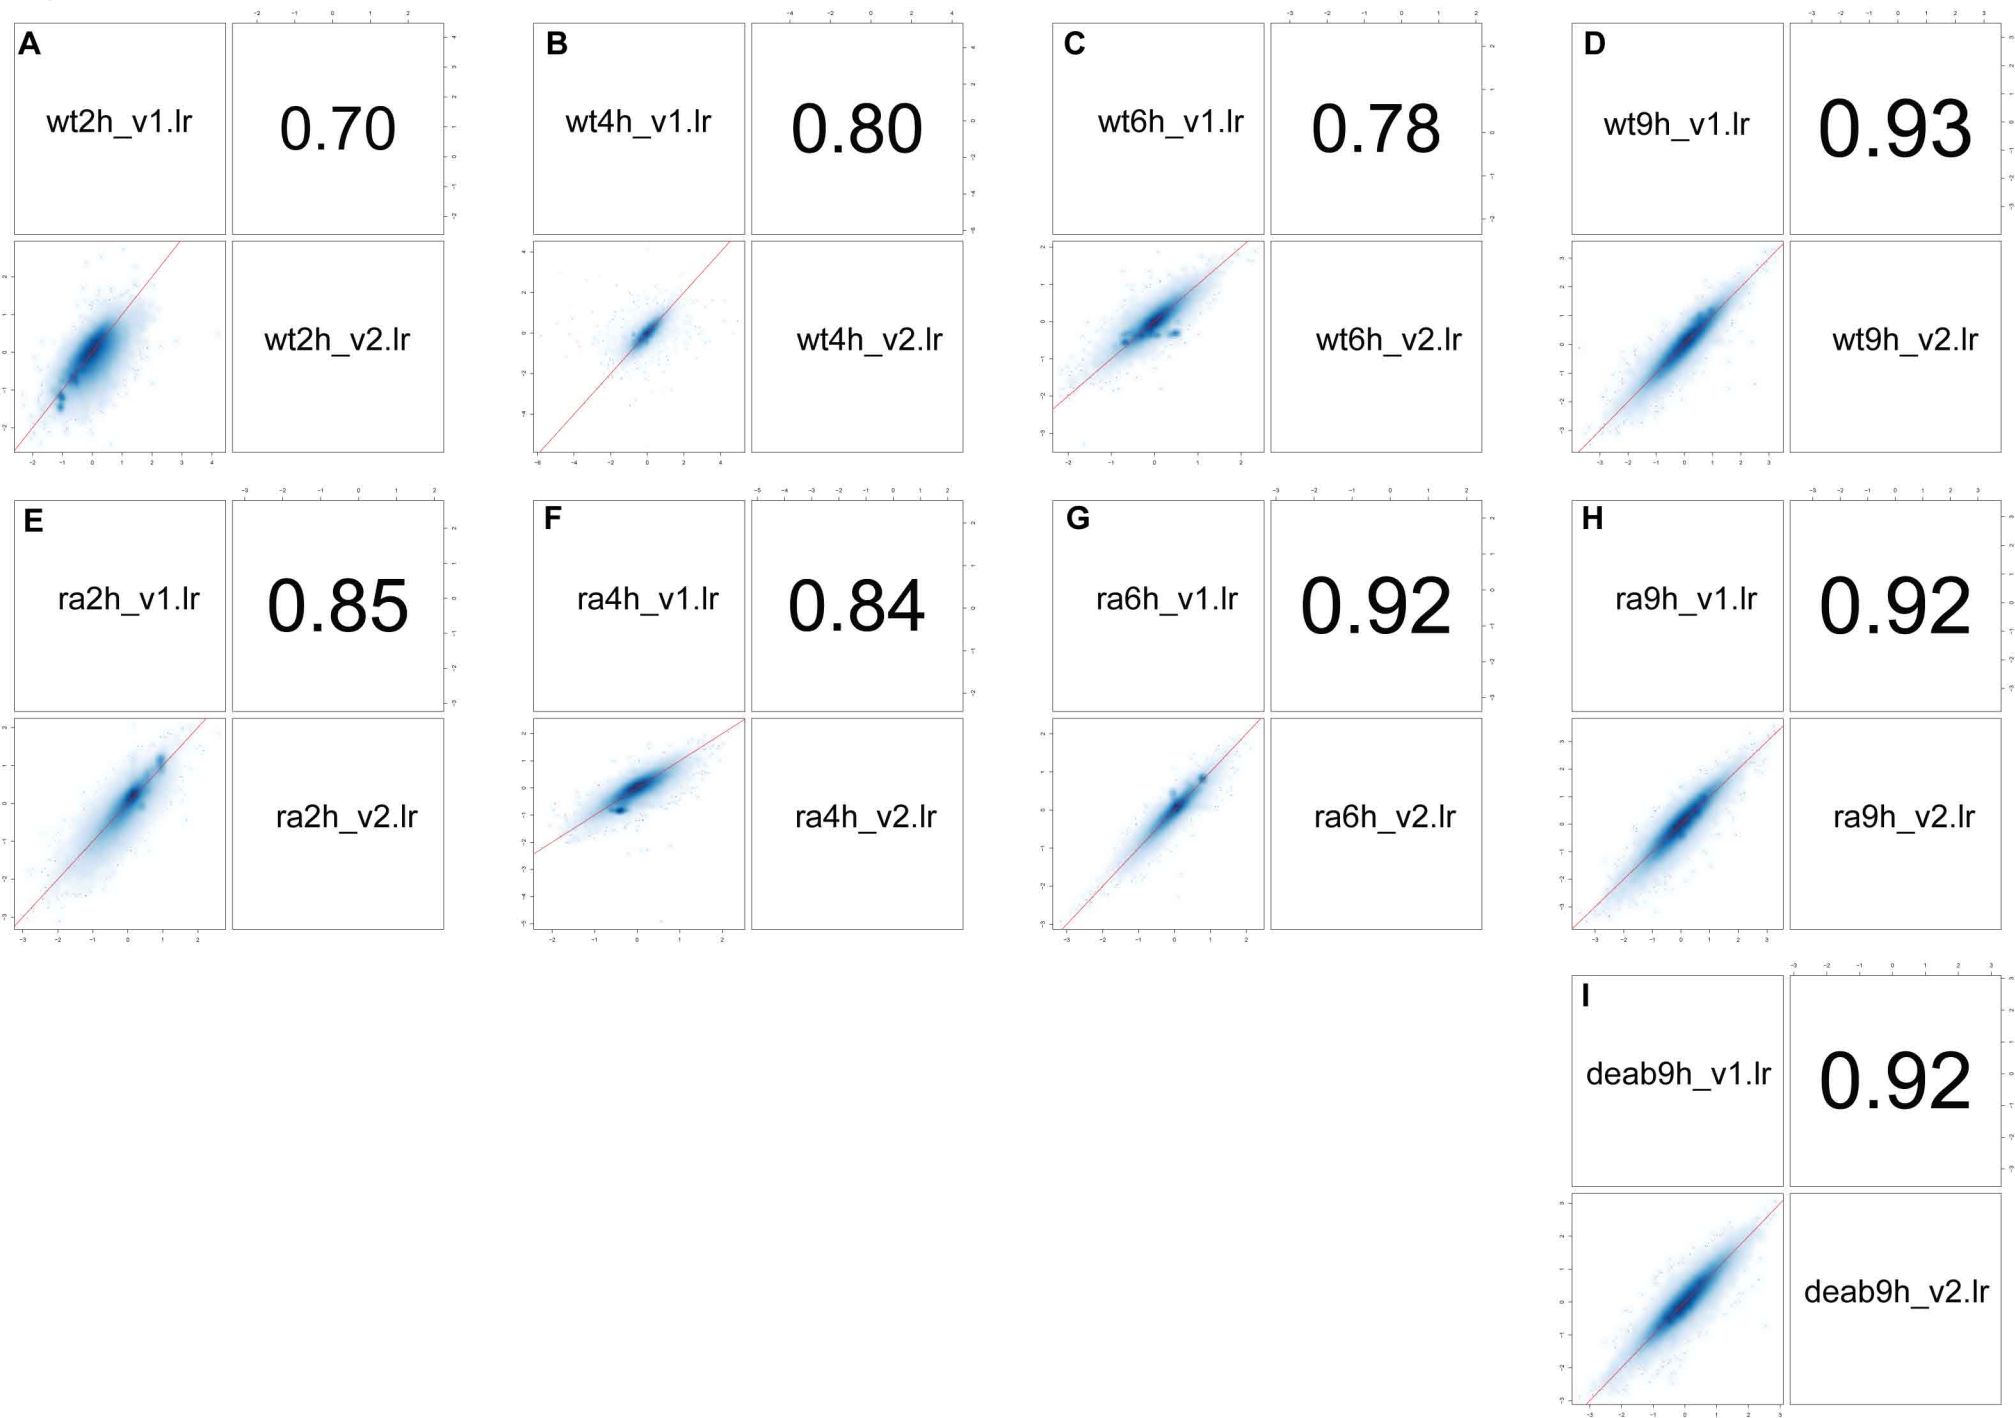

**Figure S2.**

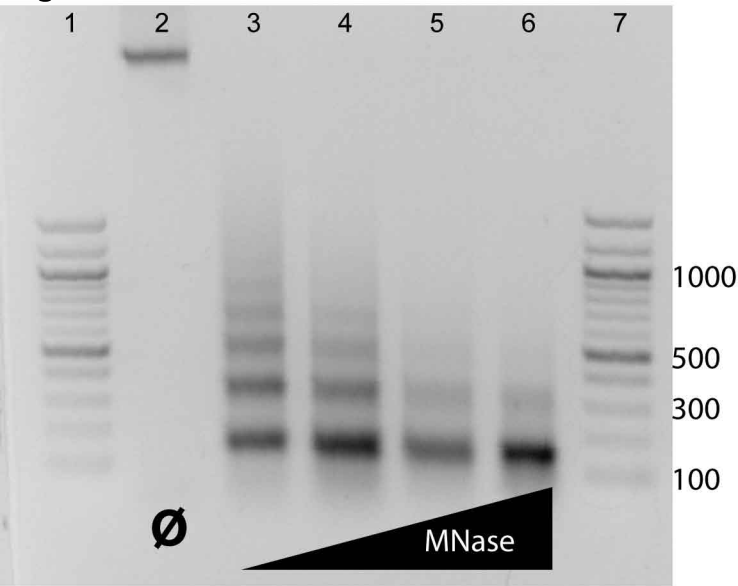

Supplement: pone.0063175.s001.pdf [file pone.0063175.s001.pdf]
